# Supplementary material for: Real-time health monitoring through urine metabolomics
Source: PubMed Central journal article supplement (PMC6848197; doi:10.1038/s41746-019-0185-y), 2019-11-11
Supplement: 41746_2019_185_MOESM1_ESM.pdf [file 41746_2019_185_MOESM1_ESM.pdf]

## Supporting Information

# Real time health monitoring through urine metabolomics

Ian J. Miller<sup>1</sup>, Sean R. Peters<sup>2</sup>, Katherine A. Overmyer<sup>3</sup>, Brett R. Paulson<sup>1,3</sup>, Michael S. Westphall<sup>1,4</sup>, and Joshua J. Coon<sup>1,2,4\*</sup>

<sup>1</sup>National Center for Quantitative Biology of Complex Systems, Madison, WI, <sup>2</sup>Department of Chemistry, University of Wisconsin-Madison, Madison, WI, <sup>3</sup>Morgridge Institute for Research, Madison, WI, <sup>4</sup>Department of Biomolecular Chemistry, University of Wisconsin-Madison, Madison, WI

\*Correspondence to:

Joshua J. Coon, Ph.D.

Professor, Departments of Chemistry and Biomolecular Chemistry

University of Wisconsin-Madison

425 Henry Mall, Room 4426

Madison, WI 53706

[jcoon@chem.wisc.edu](mailto:jcoon@chem.wisc.edu)

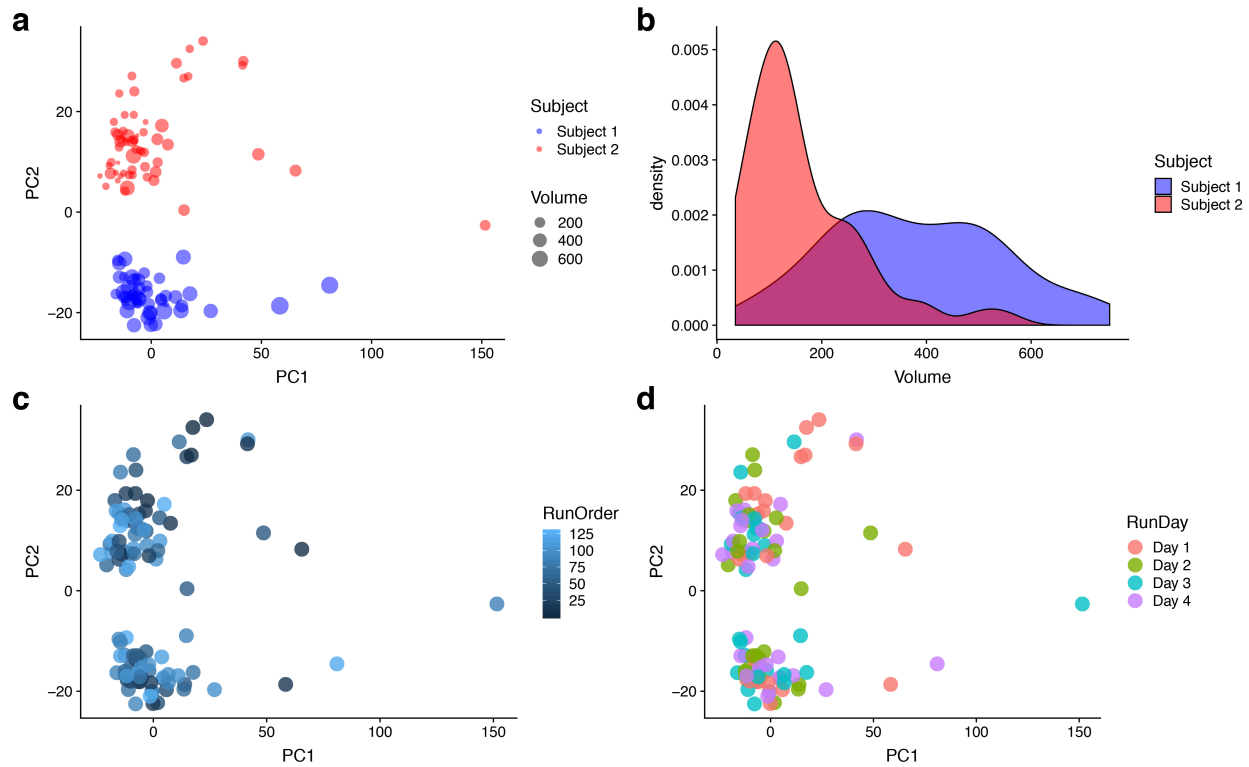

**Supplementary Figure 1.** PCA-based quality control analysis. (a) Samples colored by Subject and sized by volume. (b) Density plot of sample volumes for Subject 1 and Subject 2. (c) Sample points colored by run order. (d) Sample points colored by run day. See **Supplementary Dataset 3** for quantitative values.

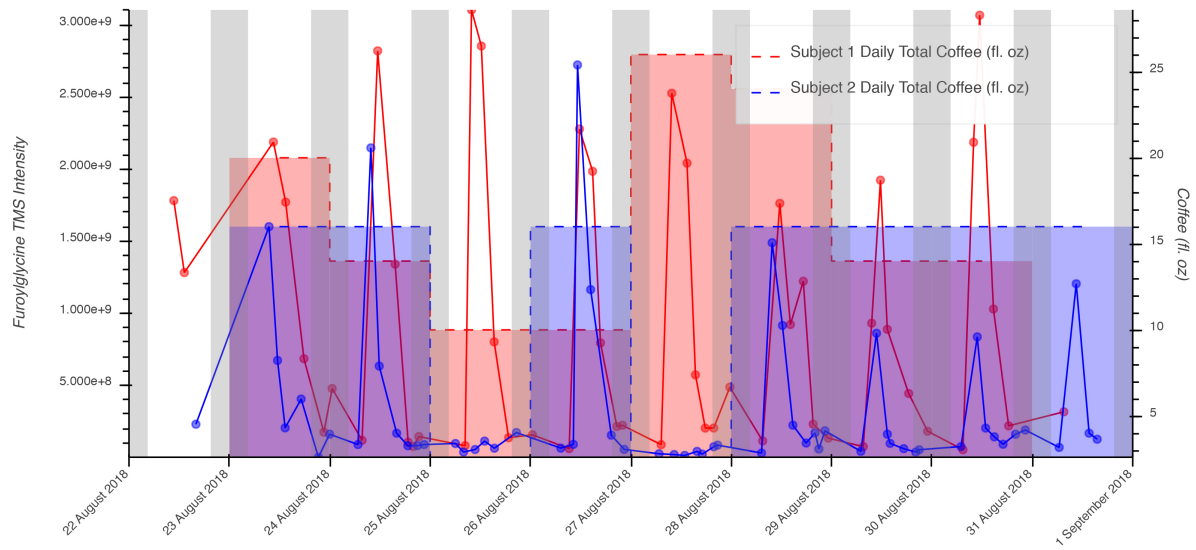

**Supplementary Figure 2.** Intensity of furoylglycine TMS over time for both subjects. Coffee (fl. oz) vs. log<sub>2</sub>-furoylglycine TMS (daily average intensity); repeated measures  $r = 0.617$ ,  $p = 0.011$ ,  $q = 0.201$ ,  $dof = 14$ .

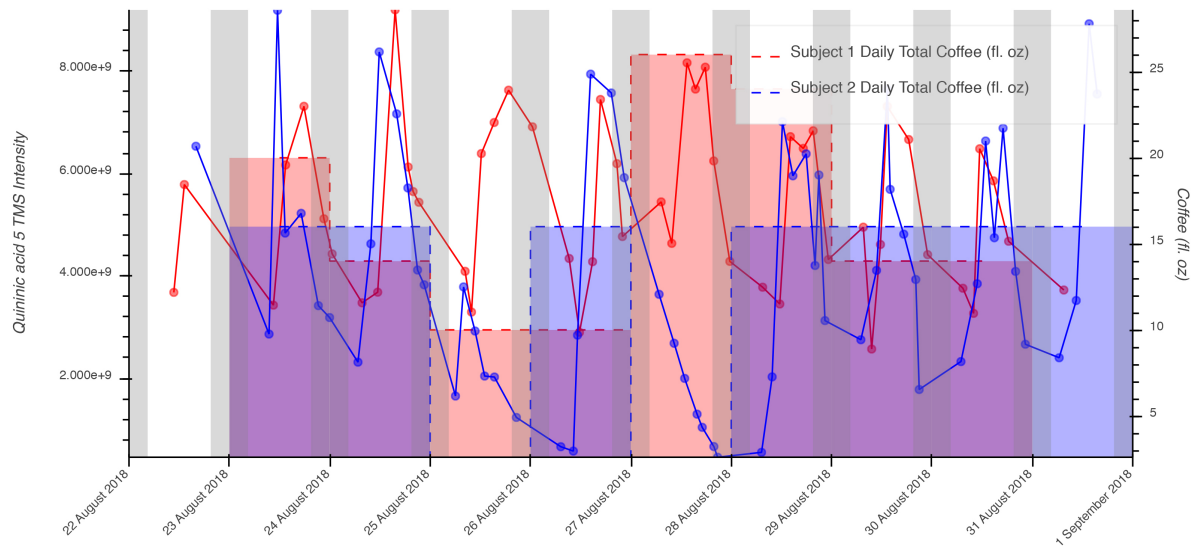

**Supplementary Figure 3.** Intensity of quininic acid 5 TMS over time for both subjects. Coffee (fl. oz) vs. log<sub>2</sub>-quininic acid 5 TMS (daily average intensity); repeated measures  $r = 0.787$ ,  $p = 2.93 \times 10^{-4}$ ,  $q = 0.0884$ ,  $dof = 14$ .

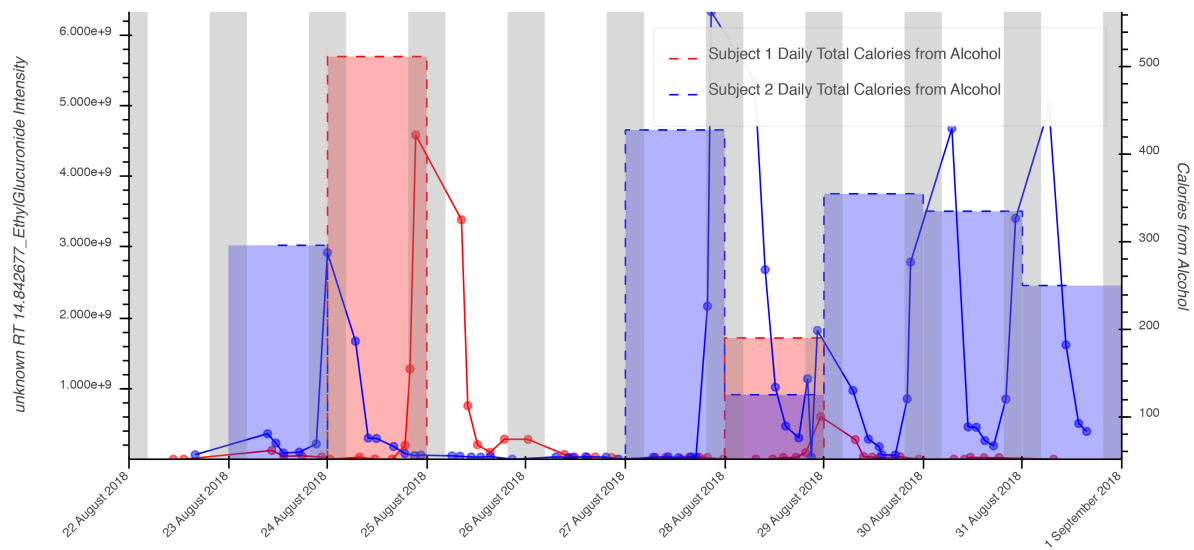

**Supplementary Figure 4.** Intensity of ethyl glucuronide over time for both subjects. Calories from Alcohol vs. log<sub>2</sub>-ethyl glucuronide (daily average intensity); repeated measures  $r = 0.657$ ,  $p = 0.006$ ,  $q = 0.0508$ ,  $dof = 14$ .

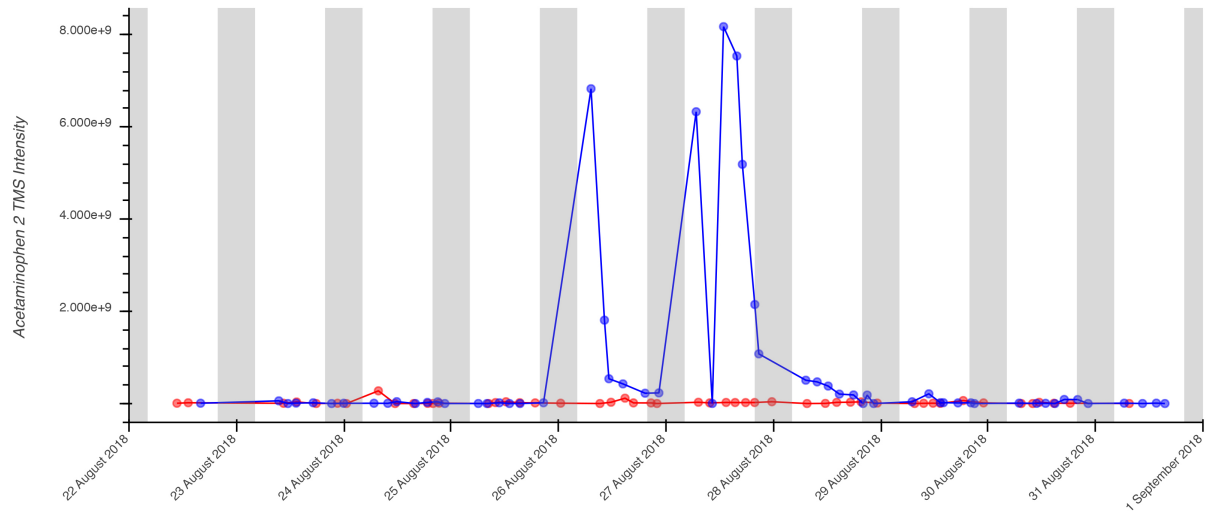

**Supplementary Figure 5.** Intensity of acetaminophen 2 TMS over time for both subjects. No quantitative data were recorded for acetaminophen consumption, so correlation metrics are not available.

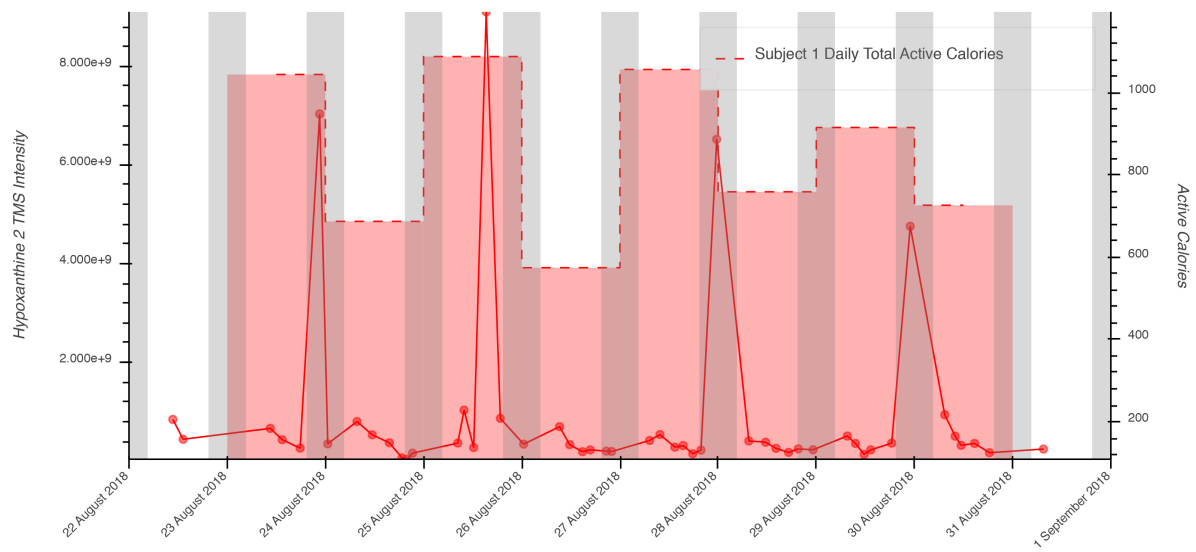

**Supplementary Figure 6.** Intensity of hypoxanthine 2 TMS over time for both subjects. Active Calories vs. log<sub>2</sub>-hypoxanthine 2 TMS (daily average intensity); Spearman's Rho: 0.833,  $p = 0.0102$ ,  $q = 0.472$ ,  $n = 8$ .

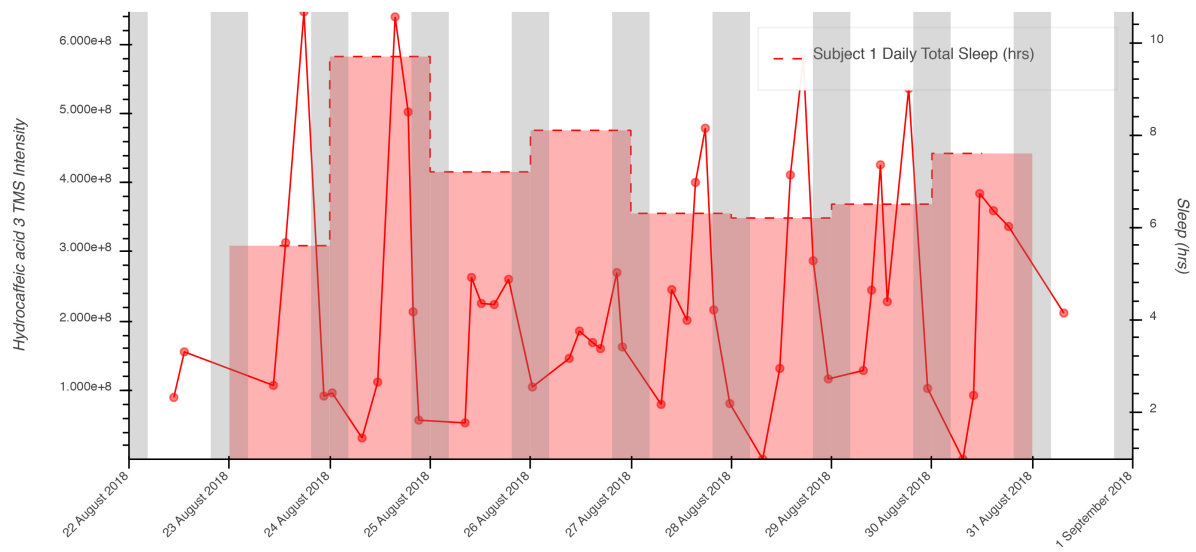

**Supplementary Figure 7.** Intensity of hydrocaffeic acid 3 TMS over time for both subjects. Sleep (hrs) vs. log<sub>2</sub>-hydrocaffeic acid 3 TMS (daily average intensity); Spearman's Rho: -0.857,  $p = 0.0137$ ,  $q = 0.551$ ,  $n = 8$ .



**Supplementary Table 1.** Summary statistics for biometric measurements

| <b>Daily Mean ± (StDev)</b> | <b>Subject 1</b> | <b>Subject 2</b> | <b>App/Hardware</b> |
|-----------------------------|------------------|------------------|---------------------|
| Dietary Calories (kcal)     | 2,904 ± (516)    | 1,793 ± (448)    | Lose It!            |
| Carbohydrates (g)           | 295 ± (60)       | 146 ± (37)       | Lose It!            |
| Fiber (g)                   | 30 ± (15)        | 32 ± (11)        | Lose It!            |
| Sugar (g)                   | 75 ± (33)        | 83 ± (37)        | Lose It!            |
| Total Fat (g)               | 120 ± (29)       | 63 ± (25)        | Lose It!            |
| Saturated Fat (g)           | 46 ± (17)        | 26 ± (12)        | Lose It!            |
| Protein (g)                 | 143 ± (38)       | 66 ± (27)        | Lose It!            |
| Cholesterol (mg)            | 352 ± (214)      | 180 ± (112)      | Lose It!            |
| Sodium (mg)                 | 3,372 ± (983)    | 2,063 ± (790)    | Lose It!            |
| Active Calories (kcal)      | 916 ± (214)      | NA               | Apple Watch         |
| Sleep (hrs)                 | 7.1 (1.2)        | NA               | Sleep Cycle         |

**Supplementary Dataset 1.** Excel file with annotated metabolites and associated diseases from HMDB (hmdb\_info.xlsx).

**Supplementary Dataset 2.** Excel file for HMDB disease associations for all available urine metabolites. (hmdb\_disease\_metabolite\_count.xlsx).

**Supplementary Dataset 3.** Excel file with combined data for metabolites and samples (combined\_sample\_data.xlsx).

**Supplementary Dataset 4.** Excel file with correlation analysis results (biometric\_correlations.xlsx).
